# Supplementary material for: Exploring the Influence of Insulin Resistance on Arterial Stiffness in Healthy Adults: From the Metabolic and Cardiovascular Health Insights of the EVasCu Study
Source: MDPI journal article supplement (doi:10.3390/nu16060791), 2024-03-11
Supplement: s1 [file s1]

## **Supplementary material**

**Exploring the influence of insulin resistance on arterial stiffness in healthy adults:  
from the metabolic and cardiovascular health insights of the EVasCu study**

### **Nutrients**

## **Index**

**Table S1.** Correlation coefficients between different markers of insulin resistance.

**Table S2.** Correlation coefficients between different markers of arterial stiffness.

**Table S1.** Correlation coefficients between different markers of insulin resistance.

| <b>Dependent vs independent variable</b> | <b>Correlation</b>     |
|------------------------------------------|------------------------|
| HOMA-IR vs QUICKI                        | $R = 0.807, p < 0.001$ |
| HOMA-IR vs TyG Index                     | $R = 0.427, p < 0.001$ |
| QUICKI vs TyG Index                      | $R = 0.491, p < 0.001$ |

**Table S2.** Correlation coefficients between different markers of arterial stiffness.

| Dependent vs independent variable | Correlation            |
|-----------------------------------|------------------------|
| aPWV vs AIx@75                    | $R = 0.190, p < 0.001$ |
| aPWV vs CAVI                      | $R = 0.627, p < 0.001$ |
| CAVI vs AIx@75                    | $R = 0.115, p = 0.027$ |
